# Supplementary material for: Learning Single-Cell Perturbation Responses using Neural Optimal Transport
Source: Research Square preprint supplement (doi:10.21203/rs.3.rs-1805107/v1), 2022-07-07
Supplement: Supplementary file 1 [file 23520d4d5594bb9234eccf05.xls]

## Sheet: compounds
#	Manufacturer	Name	MW	CHEM_NAME
1	Adooq Bioscience	Palbociclib	447.54	6-acetyl-8-cyclopentyl-5-methyl-2-{[5-(1-piperazinyl)-2-pyridinyl]amino}pyrido[2,3-d]pyrimidin-7(8H)-one
2	Adooq Bioscience	Dabrafenib	519.57	N-{3-[5-(2-amino-4-pyrimidinyl)-2-tert-butyl-1,3-thiazol-4-yl]-2-fluorophenyl}-2,6-difluorobenzenesulfonamide
3	Adooq Bioscience	Ixazomib	361.03	(1R)-1-({[(2,5-dichlorobenzoyl)amino]acetyl}amino)-3-methylbutylboronic acid
4	Adooq Bioscience	Olaparib	434.47	4-(3-{[4-(cyclopropylcarbonyl)-1-piperazinyl]carbonyl}-4-fluorobenzyl)-1(2H)-phthalazinone
5	Adooq Bioscience	Trametinib	615.4	N-[3-(3-cyclopropyl-5-(2-fluoro-4-iodoanilino)-6,8-dimethyl-2,4,7-trioxo-3,4,6,7-tetrahydropyrido[4,3-d]pyrimidin-1(2H)-yl)phenyl]acetamide
6	Adooq Bioscience	Dasatinib	488.01	N-(2-chloro-6-methylphenyl)-2-({6-[4-(2-hydroxyethyl)-1-piperazinyl]-2-methyl-4-pyrimidinyl}amino)-1,3-thiazole-5-carboxamide
7	Adooq Bioscience	Vemurafenib	489.93	N-(3-{[5-(4-chlorophenyl)-1H-pyrrolo[2,3-b]pyridin-3-yl]carbonyl}-2,4-difluorophenyl)-1-propanesulfonamide
8	Adooq Bioscience	Pomalidomide	273.25	4-amino-2-(2,6-dioxo-3-piperidinyl)-1H-isoindole-1,3(2H)-dione
9	Adooq Bioscience	Ulixertinib	433.34	(S)-4-(5-chloro-2-(isopropylamino)pyridin-4-yl)-N-(1-(3-chlorophenyl)-2-hydroxyethyl)-1H-pyrrole-2-carboxamide
10	Adooq Bioscience	Panobinostat	349.43	(2E)-N-hydroxy-3-[4-({[2-(2-methyl-1H-indol-3-yl)ethyl]amino}methyl)phenyl]-2-propenamide
11	Adooq Bioscience	Regorafenib	482.82	4-(4-(3-(4-chloro-3-(trifluoromethyl)phenyl)ureido)-3-fluorophenoxy)-N-methylpicolinamide
12	Adooq Bioscience	Lenalidomide	259.26	(3R)-3-(4-amino-1-oxo-1,3-dihydro-2H-isoindol-2-yl)-2,6-piperidinedione
13	Adooq Bioscience	Decitabine	228.21	4-amino-1-((2R,4S,5R)-4-hydroxy-5-(hydroxymethyl)tetrahydrofuran-2-yl)-1,3,5-triazin-2(1H)-one
14	Adooq Bioscience	Midostaurin	570.65	N-((5S,6R,7R,9R)-6-methoxy-5-methyl-14-oxo-6,7,8,9,15,16-hexahydro-5H,14H-17-oxa-4b,9a,15-triaza-5,9-methanodibenzo[b,h]cyclonona[jkl]cyclopenta[e]-as-indacen-7-yl)-N-methylbenzamide
15	Aldrich-CPR	Dacarbazine	182.18	5-[(1E)-3,3-dimethyl-1-triazenyl]-1H-imidazole-4-carboxamide
16	Aldrich-CPR	Everolimus	958.24
17	Aldrich-CPR	Dexamethasone	392.47	(11beta,16alpha)-9-fluoro-11,17,21-trihydroxy-16-methylpregna-1,4-diene-3,20-dione
18	Aldrich-CPR	Temozolomide	194.15	3-methyl-4-oxo-3,4-dihydroimidazo[5,1-d][1,2,3,5]tetraazine-8-carboxamide
19	Aldrich-CPR	Imatinib	493.61	4-[(4-methyl-1-piperazinyl)methyl]-N-(4-methyl-3-{[4-(3-pyridinyl)-2-pyrimidinyl]amino}phenyl)benzamide
20	Aldrich-CPR	Hydroxyurea	76.05	N-hydroxyurea
21	Aldrich-CPR	Crizotinib	450.34	3-{[(1R)-1-(2,6-dichloro-3-fluorophenyl)ethyl]oxy}-5-[1-(4-piperidinyl)-1H-pyrazol-4-yl]-2-pyridinylamine
22	Aldrich-CPR	Melphalan	305.2	(2S)-2-amino-3-{4-[bis(2-chloroethyl)amino]phenyl}propanoic acid
23	Aldrich-CPR	Paclitaxel	853.92	(2aR,4S,4aS,6R,9S,11S,12S,12aR,12bS)-9-(((2R,3S)-3-benzamido-2-hydroxy-3-phenylpropanoyl)oxy)-12-(benzoyloxy)-4,11-dihydroxy-4a,8,13,13-tetramethyl-5-oxo-3,4,4a,5,6,9,10,11,12,12a-decahydro-1H-7,11-methanocyclodeca[3,4]benzo[1,2-b]oxete-6,12b(2aH)-diyl diacetate
24	AvaChem Scientific	Vindesine	850	methyl (5S,7S,9S)-9-((3aR,3a1R,4R,5S,5aR,10bR)-5-carbamoyl-3a-ethyl-4,5-dihydroxy-8-methoxy-6-methyl-3a,3a1,4,5,5a,6,11,12-octahydro-1H-indolizino[8,1-cd]carbazol-9-yl)-5-ethyl-5-hydroxy-1,4,5,6,7,8,9,10-octahydro-2H-3,7-methano[1]azacycloundecino[5,4-b]indole-9-carboxylate
25	Cayman Chemical	Mln2480	506.29	(R)-2-(1-(6-amino-5-chloropyrimidine-4-carboxamido)ethyl)-N-(5-chloro-4-(trifluoromethyl)pyridin-2-yl)thiazole-5-carboxamide
26	MedChem Express	Sorafenib	464.83	4-[4-({[4-chloro-3-(trifluoromethyl)anilino]carbonyl}amino)phenoxy]-N-methyl-2-pyridinecarboxamide
27	Selleck Chemicals	Cisplatin	298.03	diaminoplatinum(IV) chloride
28	Target Molecule Corp.	Erlotinib	393.44	N-(3-ethynylphenyl)-6,7-bis(2-methoxyethoxy)-4-quinazolinamine
